# Supplementary material for: In Silico Survey and Characterization of Babesia microti Functional and Non-Functional Proteases
Source: MDPI journal article supplement (doi:10.3390/pathogens10111457), 2021-11-10
Supplement: s1 [file s1]

A) Suppl. Table S1. M41 metalloprotease paralogue family of *B. microti*. Paralogues of XP\_021338270 were identified by pBLAST searches within the *B. microti* predicted proteome ( $E_{\text{value}} < 0.05$ ). Only the first three of the list bear an metalloprotease domain and are predicted to have metalloprotease catalytic activity, while for the remaining such a domain cannot be predicted and likely fulfill other cellular functions, according to the conserved domains they possess.

| Protein ID   | GenBank annotation                                              | Metalloprotease domain | Other conserved domains                                         | Possible functions                                                                  |
|--------------|-----------------------------------------------------------------|------------------------|-----------------------------------------------------------------|-------------------------------------------------------------------------------------|
| XP_021338270 | Peptidase family M41                                            | Yes                    | No                                                              | Metalloprotease                                                                     |
| XP_012648901 | ATPase family associated with various cellular activities (AAA) | Yes                    | No                                                              | Metalloprotease                                                                     |
| XP_021338301 | AFG3 family protein                                             | Yes                    | - pfam06480: FtsH Extracellular                                 | Metalloprotease<br>Control of correct folding of proteins                           |
| XP_012648808 | 26S proteasome regulatory subunit T1                            | No                     | -COG1222: RPT1, ATP-dependent 26S proteasome regulatory subunit | Proteasome regulation: Posttranslational modification, protein turnover, chaperones |
| XP_012647944 | 26S proteasome regulatory subunit T5                            | No                     |                                                                 |                                                                                     |

|              |                                               |    |                                                                        |                                                                     |
|--------------|-----------------------------------------------|----|------------------------------------------------------------------------|---------------------------------------------------------------------|
| XP_021338610 | 26S proteasome regulatory subunit T6          | No |                                                                        |                                                                     |
| XP_021337282 | 26S proteasome regulatory subunit T4          | No |                                                                        |                                                                     |
| XP_021337577 | 26S proteasome regulatory subunit T3          | No | PTZ00454; 26S protease regulatory subunit 6B-like protein; Provisional | Proteasome regulation?                                              |
| XP_021338764 | 26S proteasome regulatory subunit T2          | No | cl33178; 26 proteasome regulatory subunit 4-like protein; Provisional  |                                                                     |
| XP_021337444 | Cell division cycle protein 48 homolog        | No | cl36852; AAA family ATPase, CDC48 subfamily                            | Budding and transfer of membrane from the ER to the Golgi apparatus |
| XP_021338213 | RIX7, NVL, ribosome biogenesis ATPase         | No |                                                                        |                                                                     |
| XP_021338827 | transitional endoplasmic reticulum ATPase     | No |                                                                        |                                                                     |
| XP_012647478 | Cell division cycle protein 48 homolog MJ1156 | No |                                                                        |                                                                     |
| XP_021337191 | vacuolar protein-sorting-associated protein 4 | No | - cl36852; AAA family ATPase, CDC48 subfamily                          | Budding and transfer of membrane from ER to Golgi                   |

|              |                             |    |                                                                                                                                                                                                                   |                                                                                                                         |
|--------------|-----------------------------|----|-------------------------------------------------------------------------------------------------------------------------------------------------------------------------------------------------------------------|-------------------------------------------------------------------------------------------------------------------------|
|              |                             |    | -cl38936: P-loop containing Nucleoside Triphosphate Hydrolases<br>- cl00299: MIT (microtubule interacting and transport)                                                                                          | Hydrolysis of nucleoside triphosphates<br>Binding to endosomal sorting complexes required for transport of microtubules |
| XP_012650057 | microtubule-severing ATPase | No | -cl38936: P-loop containing Nucleoside Triphosphate Hydrolases<br>-pfam17862: AAA+ lid domain<br>-cl32576: DNA-binding ATP-dependent protease La                                                                  | Hydrolysis of nucleoside triphosphates<br>Protease?                                                                     |
| XP_021337583 | vesicle-fusing ATPase       | No | -cl38936: P-loop containing Nucleoside Triphosphate Hydrolases<br>- cl36852; AAA family ATPase, CDC48 subfamily<br>- smart01073: Cell division protein 48 (CDC48) N-terminal domain<br>-cl34016: MoxR-like ATPase | Hydrolysis of nucleoside triphosphates<br>Fusion of vesicles                                                            |

|              |                                               |    |                                                                                                                                   |                                                                            |
|--------------|-----------------------------------------------|----|-----------------------------------------------------------------------------------------------------------------------------------|----------------------------------------------------------------------------|
|              |                                               |    |                                                                                                                                   |                                                                            |
| XP_012648107 | ATPase family AAA domain-containing protein 3 | No | - cl37828: DUF3523 super family<br>(unknown function)<br><br>-cl38936: P-loop containing<br>Nucleoside Triphosphate<br>Hydrolases | Hydrolysis of nucleoside triphosphates<br><br>Unknown additional functions |

A) Suppl. Table S2. S59 paralogue family of *B. microti*. Paralogues of XP\_012650001 were identified by pBLAST searches within the *B. microti* predicted proteome ( $E_{\text{value}} < 0.05$ ). In two members of this family, a protease domain cannot be predicted. These proteins are predicted to be localized in the nucleus (Suppl. Table 2 and to form part of nuclear pore complexes.

| Protein ID   | GenBank annotation           | Serine protease domain | Other conserved domains                                                                                    | Possible functions             |
|--------------|------------------------------|------------------------|------------------------------------------------------------------------------------------------------------|--------------------------------|
| XP_012650001 | Nucleoporin autopeptidase    | Yes                    | pfam13634 Nucleoporin FG repeat region                                                                     | Peptidase                      |
| XP_012649223 | Nucleoporin FG repeat region | No                     | cl41472: ser_rich_anae_1 super family                                                                      | Part of nuclear pore complexes |
| XP_021338605 | Nucleoporin FG repeat region | No                     | - pfam13634: Nucleoporin_FG<br>- cl32064: PRK04778 super family<br>- cl37900: Nucleoporin_FG2 super family | Part of nuclear pore complexes |

A) Supplementary Table S3: Predicted subcellular localization of *B. microti* proteases. The possible localization of each protease was evaluated by the presence of a signal peptide (SignalP), number of transmembrane domains (TMHMM) and the DeepLoc predictor algorithm.

| Type               | Family | Protein id.  | Genbank annotation           | Topology |       | Localization (DeepLoc) |                     |
|--------------------|--------|--------------|------------------------------|----------|-------|------------------------|---------------------|
|                    |        |              |                              | SignalP  | TMHMM | Compartment            | Soluble or Membrane |
| Aspartic proteases | A1     | XP_021337483 | Cathepsin E-B                | Yes      | 0     | Lysosome/Vacuole       | Membrane            |
|                    |        | XP_021337801 | Pepsin A                     | Yes      | 0     | Extracellular          | Soluble             |
|                    |        | XP_021338468 | Eukaryotic aspartyl protease | No       | 0     | Extracellular          | Soluble             |
|                    |        | XP_021338748 | Eukaryotic aspartyl protease | No       | 1     | Lysosome / Vacuole     | Soluble             |
|                    |        |              |                              |          |       |                        |                     |

|                    |      |              |                                 |     |   |                       |          |
|--------------------|------|--------------|---------------------------------|-----|---|-----------------------|----------|
|                    |      | XP_021337625 | Plasmepsin V                    | Yes | 0 | Plastid               | Soluble  |
|                    | A28  | XP_021337501 | DNA damage-inducible protein 1  | No  | 0 | Cytoplasm             | Soluble  |
|                    | A22B | XP_021338622 | Signal peptide peptidase        | No  | 8 | Endoplasmic reticulum | Membrane |
| Cysteine proteases | C1A  | XP_021338611 | Cathepsin C                     | Yes | 0 | Extracellular         | Soluble  |
|                    |      | XP_012647584 | Cysteine proteinase             | No  | 1 | Lysosome/Vacuole      | Membrane |
|                    |      | XP_012650559 | Papain family cysteine protease | No  | 1 | Lysosome/Vacuole      | Membrane |
|                    |      |              |                                 |     |   |                       |          |
|                    |      |              |                                 |     |   |                       |          |

|  |     |              |                                          |     |   |                       |          |
|--|-----|--------------|------------------------------------------|-----|---|-----------------------|----------|
|  |     | XP_012650562 | Papain family cysteine protease          | No  | 1 | Lysosome/Vacuole      | Membrane |
|  |     | XP_012647628 | Papain family cysteine protease          | No  | 1 | Lysosome/Vacuole      | Membrane |
|  | C2  | XP_021337703 | Calpain family cysteine protease         | No  | 0 | Cytoplasm             | Soluble  |
|  | C12 | XP_021337460 | ubiquitin carboxyl-terminal hydrolase L3 | No  | 0 | Cytoplasm             | Soluble  |
|  | C13 | XP_012650207 | GPI-anchored transamidase                | Yes | 1 | Endoplasmic reticulum | Membrane |
|  | C14 | XP_012648342 | Caspase domain                           | No  | 0 | Cytoplasm             | Soluble  |
|  | C19 | XP_012647713 | U4/U6.U5 tri-snRNP-associated protein 2  | No  | 0 | Nucleus               | Soluble  |
|  |     |              |                                          |     |   |                       |          |



|  |              |                                            |    |   |           |         |
|--|--------------|--------------------------------------------|----|---|-----------|---------|
|  |              |                                            |    |   |           |         |
|  | XP_012649658 | Ubiquitin carboxyl-terminal hydrolase 25   | No | 0 | Cytoplasm | Soluble |
|  | XP_021338598 | Ubiquitin carboxyl-terminal hydrolase      | No | 0 | Nucleus   | Soluble |
|  | XP_012649978 | Ubiquitin carboxyl-terminal hydrolase 14   | No | 0 | Cytoplasm | Soluble |
|  | XP_012647380 | Ubiquitin carboxyl-terminal hydrolase 7    | No | 0 | Cytoplasm | Soluble |
|  | XP_021337689 | Ubiquitin carboxyl-terminal hydrolase      | No | 0 | Nucleus   | Soluble |
|  | XP_021338067 | Ubiquitin carboxyl-terminal hydrolase 5/13 | No | 0 | Cytoplasm | Soluble |

|  |     |              |                                                               |    |   |               |         |
|--|-----|--------------|---------------------------------------------------------------|----|---|---------------|---------|
|  | C26 | XP_012647696 | CTP synthase                                                  | No | 0 | Cytoplasm     | Soluble |
|  |     | XP_021337469 | carbamoyl-phosphate synthase// aspartate carbamoyltransferase | No | 0 | Cytoplasm     | Soluble |
|  | C44 | XP_012650079 | glucosamine--fructose-6-phosphate aminotransferase            | No | 0 | Cytoplasm     | Soluble |
|  | C48 | XP_012648199 | sentrin-specific protease 1                                   | No | 0 | Nucleus       | Soluble |
|  |     | XP_021337449 | sentrin-specific protease 2                                   | No | 0 | Nucleus       | Soluble |
|  | C54 | XP_021337321 | autophagy-related protein 4                                   | No | 0 | Mitochondrion | Soluble |
|  |     |              |                                                               |    |   |               |         |

|                        |      |              |                                                                   |    |   |           |         |
|------------------------|------|--------------|-------------------------------------------------------------------|----|---|-----------|---------|
|                        | C56  | XP_012649637 | 4-methyl-5(b-hydroxyethyl)-thiazole<br>monophosphate biosynthesis | No | 0 | Plastid   | Soluble |
|                        | C78  | XP_021337753 | Peptidase family C78                                              | No | 0 | Cytoplasm | Soluble |
|                        | C85A | XP_021337245 | Ubiquitin thioesterase otu2                                       | No | 0 | Nucleus   | Soluble |
|                        | C86  | XP_021338227 | Josephin                                                          | No | 0 | Nucleus   | Soluble |
|                        | C97  | XP_021338702 | PPPDE putative peptidase domain                                   | No | 0 | Plastid   | Soluble |
|                        | C115 | XP_021337547 | Protein FAM63A                                                    | No | 0 | Cytoplasm | Soluble |
| Threonine<br>proteases | T1A  | XP_012647140 | 20S proteasome subunit alpha 1                                    | No | 0 | Cytoplasm | Soluble |

|  |              |                                |    |   |                 |          |
|--|--------------|--------------------------------|----|---|-----------------|----------|
|  |              |                                |    |   |                 |          |
|  | XP_012650489 | 20S proteasome subunit alpha 2 | No | 0 | Golgi apparatus | Membrane |
|  | XP_021337746 | 20S proteasome subunit alpha 3 | No | 0 | Nucleus         | Soluble  |
|  | XP_021337745 | 20S proteasome subunit alpha 4 | No | 0 | Cytoplasm       | Soluble  |
|  | XP_012649604 | 20S proteasome subunit alpha 5 | No | 0 | Cytoplasm       | Soluble  |
|  | XP_012650085 | 20S proteasome subunit alpha 6 | No | 0 | Cytoplasm       | Soluble  |
|  | XP_021338656 | 20S proteasome subunit alpha 7 | No | 0 | Cytoplasm       | Soluble  |

|  |  |              |                               |    |   |               |         |
|--|--|--------------|-------------------------------|----|---|---------------|---------|
|  |  | XP_012648315 | 20S proteasome subunit beta 1 | No | 0 | Cytoplasm     | Soluble |
|  |  | XP_012649453 | 20S proteasome subunit beta 2 | No | 0 | Mitochondrion | Soluble |
|  |  | XP_012649873 | 20S proteasome subunit beta 3 | No | 0 | Cytoplasm     | Soluble |
|  |  | XP_012647857 | 20S proteasome subunit beta 4 | No | 0 | Cytoplasm     | Soluble |
|  |  | XP_021338777 | 20S proteasome subunit beta 5 | No | 0 | Cytoplasm     | Soluble |
|  |  | XP_012650322 | 20S proteasome subunit beta 6 | No | 0 | Cytoplasm     | Soluble |
|  |  |              |                               |    |   |               |         |

|                      |      |              |                                          |    |   |               |         |
|----------------------|------|--------------|------------------------------------------|----|---|---------------|---------|
|                      |      | XP_021337419 | 20S proteasome subunit beta 7            | No | 0 | Peroxisome    | Soluble |
| Metallo<br>proteases | M01  | XP_012648031 | aminopeptidase N                         | No | 0 | Plastid       | Soluble |
|                      | M3A  | XP_021338435 | mitochondrial intermediate peptidase     | No | 0 | Mitochondrion | Soluble |
|                      | M16B | XP_021338255 | Probable zinc protease PqqL              | No | 0 | Mitochondrion | Soluble |
|                      |      | XP_021337876 | Mitochondrial processing peptidase       | No | 0 | Mitochondrion | Soluble |
|                      |      | XP_021338005 | Mitochondrial processing peptidase       | No | 0 | Mitochondrion | Soluble |
|                      | M16C | XP_012650528 | peptidase M16 inactive domain containing | No | 0 | Cytoplasm     | Soluble |

|  |      |              |                                  |     |   |               |         |
|--|------|--------------|----------------------------------|-----|---|---------------|---------|
|  |      |              |                                  |     |   |               |         |
|  |      | XP_021338727 | Uncharacterized protein C05D11.1 | No  | 0 | Cytoplasm     | Soluble |
|  | M17  | XP_021338349 | leucyl aminopeptidase            | No  | 0 | Plastid       | Soluble |
|  | M18  | XP_021338536 | aminopeptidase                   | No  | 0 | Cytoplasm     | Soluble |
|  | M24A | XP_021337644 | methionyl aminopeptidase         | No  | 0 | Cytoplasm     | Soluble |
|  |      | XP_021337770 | methionyl aminopeptidase         | No  | 1 | Mitochondrion | Soluble |
|  |      | XP_021337427 | methionyl aminopeptidase         | Yes | 0 | Mitochondrion | Soluble |

|  |      |              |                                                           |    |   |                       |          |
|--|------|--------------|-----------------------------------------------------------|----|---|-----------------------|----------|
|  |      | XP_012649271 | methionyl aminopeptidase                                  | No | 0 | Cytoplasm             | Soluble  |
|  | M24B | XP_012650004 | Xaa-Pro aminopeptidase                                    | No | 0 | Cytoplasm             | Soluble  |
|  | M41* | XP_021338270 | Peptidase family M41                                      | No | 0 | Mitochondrion         | Membrane |
|  |      | XP_021338301 | AFG3 family protein                                       | No | 0 | Mitochondrion         | Membrane |
|  |      | XP_012648901 | ATPase family associated with various cellular activities | No | 1 | Endoplasmic reticulum | Membrane |
|  | M48A | XP_012650086 | STE24 endopeptidase                                       | No | 7 | Endoplasmic reticulum | Membrane |
|  |      |              |                                                           |    |   |                       |          |



|                  |     |              |                                                    |    |   |                       |          |
|------------------|-----|--------------|----------------------------------------------------|----|---|-----------------------|----------|
|                  | M67 | XP_021338577 | 26S proteasome regulatory subunit N11              | No | 0 | Cytoplasm             | Soluble  |
| Serine proteases | S1B | XP_021338066 | Protease Do-like 9                                 | No | 0 | Mitochondrion         | Soluble  |
|                  | S09 | XP_021337263 | hypothetical protein                               | No | 0 | Mitochondrion         | Soluble  |
|                  |     | XP_012649807 | Alpha/beta hydrolase domain-containing protein 17C | No | 0 | Endoplasmic reticulum | Membrane |
|                  |     | XP_021338600 | alpha/beta hydrolase, putative                     | No | 0 | Nucleus               | Membrane |
|                  |     | XP_012650025 | alpha/beta hydrolase domain-containing protein 17B | No | 0 | Nucleus               | Soluble  |
|                  | S12 | XP_012649063 | aarF domain-containing kinase                      | No | 0 | Peroxisome            | Membrane |

|     |              |                                                 |     |   |                       |          |
|-----|--------------|-------------------------------------------------|-----|---|-----------------------|----------|
|     |              |                                                 |     |   |                       |          |
| S14 | XP_012648206 | ATP-dependent Clp protease, protease subunit    | No  | 1 | Mitochondrion         | Soluble  |
|     | XP_021337686 | Clp protease                                    | Yes | 0 | Extracellular         | Soluble  |
| S16 | XP_012649081 | Lon protease homolog 1 mitochondrial            | No  | 0 | Mitochondrion         | Soluble  |
| S26 | XP_021338290 | mitochondrial inner membrane protease subunit 1 | No  | 0 | Golgi apparatus       | Membrane |
|     | XP_012650493 | signal peptidase, endoplasmic reticulum-type    | No  | 1 | Endoplasmic reticulum | Membrane |
| S33 | XP_012648716 | cardiolipin-specific phospholipase              | No  | 0 | Cytoplasm             | Soluble  |

|  |     |              |                                    |     |   |                       |          |
|--|-----|--------------|------------------------------------|-----|---|-----------------------|----------|
|  |     | XP_021338360 | Rhomboid-like protease 6           | No  | 3 | Mitochondrion         | Membrane |
|  |     | XP_021338239 | ROM4                               | No  | 7 | Golgi apparatus       | Membrane |
|  |     | XP_021338238 | ROM3                               | No  | 6 | Golgi apparatus       | Membrane |
|  | S54 | XP_012650510 | hypothetical protein BmR1_04g09675 | Yes | 3 | Endoplasmic reticulum | Membrane |
|  |     | XP_021338098 | hypothetical protein BMR1_02g01230 | No  | 6 | Golgi apparatus       | Membrane |
|  |     | XP_012647608 | Der1-like family                   | No  | 4 | Endoplasmic reticulum | Membrane |
|  |     |              |                                    |     |   |                       |          |

|  |     |              |                           |     |   |                       |          |
|--|-----|--------------|---------------------------|-----|---|-----------------------|----------|
|  |     | XP_012650093 | Der1-like family          | Yes | 2 | Mitochondrion         | Membrane |
|  |     | XP_012649979 | Derlin 2/3                | No  | 4 | Endoplasmic reticulum | Membrane |
|  | S59 | XP_012650001 | Nucleoporin autopeptidase | No  | 0 | Nucleus               | Soluble  |

A) Suppl. Table S4. Comparison between the repertoire of *B. microti* and *B. bovis* proteases predicted as active at least in one of either species. Proteases predicted as active in one and inactive in the other species are marked with an asterisk and shaded in lighter colors. Orthology was evaluated by the BLASTp bidirectional best hit method.

| Proteases | <i>Babesia bovis</i> | <i>Babesia microti</i> | Orthologous | <i>B. bovis</i><br>only | <i>B. microti</i><br>only |
|-----------|----------------------|------------------------|-------------|-------------------------|---------------------------|
| Aspartyl  |                      |                        |             |                         |                           |
| A1        | XP_001611483         | XP_021337483           | x           |                         |                           |
| A1        | XP_001610711         | XP_021337801           | x           |                         |                           |
| A1        | XP_001610888         | XP_021338748           | x           |                         |                           |
| A1        |                      | XP_021338468           |             |                         | x                         |
| A1        | XP_001610957         |                        |             | x                       |                           |
| A1        | XP_001611299         | XP_021337625           | x           |                         |                           |
| A22       |                      | XP_021338622           |             |                         | x                         |
| A28       | XP_001612143         | XP_021337501           | x           |                         |                           |
| Cysteine  |                      |                        |             |                         |                           |
| C1A       | XP_001608716         | XP_021338611           | x           |                         |                           |
| C1A       | XP_001609546         |                        |             | x                       |                           |
| C1A       | XP_001612131         |                        |             | x                       |                           |
| C1A       | XP_001610695         | XP_012650559           | x           |                         |                           |
| C1A       |                      | XP_012647628           |             |                         | x                         |
| C1A       |                      | XP_012650562           |             |                         | x                         |
| C2        | XP_001611895         | XP_021337703           | x           |                         |                           |
| C12       | XP_001612184         | XP_021337460*          | x           |                         |                           |

|          |              |               |   |   |   |
|----------|--------------|---------------|---|---|---|
| C13      | XP_001608682 | XP_012650207  | x |   |   |
| C19      | XP_001611300 | XP_012649658  | x |   |   |
| C19      | XP_001611747 | XP_021338598  | x |   |   |
| C19      | XP_001611991 | XP_012649978  | x |   |   |
| C19      | XP_001609338 | XP_012647380* | x |   |   |
| C19      | XP_001610364 | XP_021338067  | x |   |   |
| C26      | XP_001610053 | XP_012647696  | x |   |   |
| C26      | XP_001611491 | XP_021337469  | x |   |   |
| C44      | XP_001609193 | XP_012650079  | x |   |   |
| C48      | XP_001609932 | XP_012648199  | x |   |   |
| C48      |              | XP_021337449  |   |   | x |
| C54      | XP_001610073 | XP_021337321  | x |   |   |
| C78      | XP_001612028 | XP_021337753  | x |   |   |
| C85      | XP_001612242 | XP_021337245  | x |   |   |
| C97      | XP_001610596 | XP_021338702  | x |   |   |
| C97      | XP_001609705 |               |   | x |   |
| Threonin |              |               |   |   |   |
| T1A      | XP_001609757 | XP_012647140  | x |   |   |
| T1A      | XP_001609795 | XP_012650322  | x |   |   |
| T1A      | XP_001610115 | XP_012648315  | x |   |   |
| T1A      | XP_001610788 | XP_012649453  | x |   |   |
| T1A      | XP_001610822 | XP_021338777  | x |   |   |
| T1A      | XP_001609200 | XP_012650085  | x |   |   |
| T1A      | XP_001611166 | XP_012650489  | x |   |   |
| T1A      | XP_001608800 | XP_012649604* | x |   |   |

|         |              |              |   |   |  |
|---------|--------------|--------------|---|---|--|
| T1A     | XP_001612044 | XP_021337746 | x |   |  |
| Metallo |              |              |   |   |  |
| M01     | XP_001610522 | XP_012648031 | x |   |  |
| M03A    | XP_001611394 | XP_021338435 | x |   |  |
| M16B    | XP_001609640 | XP_021338255 | x |   |  |
| M16B    | XP_001609291 | XP_021338005 | x |   |  |
| M16C    | XP_001610012 | XP_012650528 | x |   |  |
| M17     | XP_001609968 | XP_021338349 | x |   |  |
| M18     | XP_001611075 | XP_021338536 | x |   |  |
| M24A    | XP_001611362 | XP_021337644 | x |   |  |
| M24A    | XP_001611993 | XP_021337770 | x |   |  |
| M24A    | XP_001609360 | XP_021337427 | x |   |  |
| M24A    | XP_001610600 | XP_012649271 | x |   |  |
| M24B    | XP_001611965 | XP_012650004 | x |   |  |
| M41     | XP_001609615 | XP_021338270 | x |   |  |
| M41     | XP_001611654 | XP_021338301 | x |   |  |
| M41     | XP_001611107 | XP_012648901 | x |   |  |
| M48A    | XP_001609199 | XP_012650086 | x |   |  |
| M67A    | XP_001610266 | XP_021338577 | x |   |  |
| Serine  |              |              |   |   |  |
| S01B    | XP_001610362 | XP_021338066 | x |   |  |
| S08A    | XP_001610126 |              |   | x |  |
| S09A    | XP_001609758 | XP_021337263 | x |   |  |
| S09X    | XP_001611738 | XP_021338600 | x |   |  |
| S09X    | XP_001611915 | XP_012649807 | x |   |  |

|      |              |               |   |   |   |
|------|--------------|---------------|---|---|---|
| S09X | XP_001610498 | XP_012650025  | x |   |   |
| S14  | XP_001609930 | XP_012648206  | x |   |   |
| S16  | XP_001611731 | XP_012649081  | x |   |   |
| S26A | XP_001609075 | XP_021338290* | x |   |   |
| S26B | XP_001611162 | XP_012650493  | x |   |   |
| S33  | XP_001610202 | XP_012648716  | x |   |   |
| S54  | XP_001609020 | XP_021338360  | x |   |   |
| S54  | XP_001610111 |               |   | x |   |
| S54  | XP_001610112 |               |   | x |   |
| S54  | XP_001610113 |               |   | x |   |
| S54  |              | XP_021338238  |   |   | x |
| S54  | XP_001610125 |               |   | x |   |
| S54  | XP_001610128 | XP_021338239  | x |   |   |
| S54  | XP_001611188 | XP_012650510* | x |   |   |
